1  
2  
3  
4 Larval density in the invasive *Drosophila suzukii*:  
5 immediate and delayed effects on life-history  
6 traits

7  
8 Alicia Reyes-Ramírez<sup>a</sup>, Zainab Belgaidi<sup>a</sup>, Patricia  
9 Gibert<sup>a</sup>, Thomas Pommier<sup>b</sup>, Aurélie Siberchicot<sup>a</sup>,  
10 Laurence Mouton<sup>a</sup>, Emmanuel Desouhant<sup>a</sup>

11 <sup>a</sup>UMR 5558, Laboratoire de Biométrie et Biologie Evolutive,  
12 CNRS, VetAgro Sup, Université de Lyon, Université Claude  
13 Bernard Lyon 1, 43 Bd du 11 Novembre 1918, 69622 Villeurbanne  
14 Cedex, France

15 <sup>b</sup>UMR 1418, Laboratoire d'Ecologie Microbienne, INRAE, CNRS,  
16 VetAgro Sup, Université Claude Bernard Lyon 1, 43 Bd du 11  
17 Novembre 1918, 69622 Villeurbanne Cedex, France

18

19

20

21 \*Corresponding author: [alicia.reyes-ramirez@univ-lyon1.fr](mailto:alicia.reyes-ramirez@univ-lyon1.fr)

22

23

## 24     **Abstract**

25     The immediate and delayed effects of density are key in determining  
26     population dynamics, since they can positively or negatively affect  
27     the fitness of individuals. These effects have great relevance for  
28     polyphagous insects for which immature stages develop within a  
29     single site of finite feeding resources. *Drosophila suzukii* is a crop  
30     pest that induces severe economic losses for agricultural production,  
31     however little is known about the effects of density on its life-history  
32     traits. In the present study, we (i) investigated the egg distribution  
33     resulting from females' egg-laying strategy and (ii) tested the  
34     immediate and delayed effects of larval density on emergence rate,  
35     development time, sex ratio of offspring, fecundity and adult size (a  
36     range of 1 to 50 larvae was used). We showed that most of fruits  
37     contain several eggs and aggregate of eggs of high density can be  
38     found in some fruits. This high density has no immediate effects on  
39     the emergence rate, but has effect on larval developmental time.  
40     This trait was involved in a trade-off with adult life-history traits:  
41     the larval development was reduced as larval density increased, but  
42     smaller and less fertile adults were produced. Our results should  
43     help to better understand the population dynamics of this species and  
44     to develop more successful control programs.

45  
46     **Keywords:** Density, *Drosophila*, Life-history traits, Trade-off.

## 47 **Introduction**

48 Density-dependence is a key driver of demographic parameters  
 49 (Hixon & Johnson, 2009). It may have positive or negative effects  
 50 on a population growth rate (Mueller, 1997). These effects can  
 51 participate in the early stages of the invasion process by establishing  
 52 minimum population sizes that, when exceeded, promote the spread  
 53 of pests (Fagan et al., 2002). Among these invasive, pest or  
 54 biocontrol auxiliaries species, many are insects (Ferguson & Joly,  
 55 2002; Pickens, 2007). Density-dependent effects are therefore  
 56 common features that define invasive or pest population dynamics’  
 57 as well as the success of biocontrol programs.

58  
 59 Density-dependent effects on demographic parameters emerge from  
 60 the combination of effects occurring at lower levels of biological  
 61 organization (Mueller, 1997; Ponton & Morimoto, 2020). Effects  
 62 observed at the individual level can be classified into immediate and  
 63 delayed effects. Immediate effects typically occur at immature  
 64 stages and are associated with resource acquisition (Dethier, 1959;  
 65 Putman, 1977). For many insect species, nutritional resources may  
 66 be in limited quantity when females lay their eggs in a finite volume  
 67 of food such as fruits or seeds, and when the whole immature  
 68 development occurs in a given seed/fruit. Therefore, female  
 69 oviposition strategies affect early developmental conditions and

70 thus larval fate as well as adult traits (Nestel et al., 2016). Delayed  
71 effects are the result of trade-offs that emerge in response to density-  
72 dependence conditions during development and that are expressed  
73 at later life stages (Agnew et al., 2002). Both immediate and delayed  
74 effects can positively or negatively affect individual fitness (Peters,  
75 2003) by altering life-history traits and promoting trade-offs (Parker  
76 & Gilbert, 2018). For example, in the lepidoptera *Sesamia*  
77 *nonagriodes*, the high density experienced during the larval stages  
78 does not affect the mortality of juveniles, but extends larval  
79 development, and results in reduced pupal weight (Fantinou et al.,  
80 2008). In this species, adult fitness is also affected with reduced  
81 fecundity and longevity of females reared in high larval densities. In  
82 general, individuals that develop in low density environments are  
83 predicted to have an advantage in later life due to expecting low  
84 levels of competition for resources (the "silver spoon" effect; Angell  
85 et al., 2020; Grafen, 1988). For example, in the speckled wood  
86 butterfly, *Pararge aegeria*, larvae reared at low densities have  
87 higher survival rate, shorter development times and result in bigger  
88 adults compared to larvae reared at high densities (Gibbs et al.,  
89 2004). Nevertheless, high density may also be beneficial, for  
90 example when individuals express a greater performance in defense  
91 against predators (Aukema & Raffa, 2004), in cooperative feeding

92 (Denno and Benrey 1997), or when beneficial horizontally  
 93 transmitting microbiota are present (Correa et al., 2018).  
 94  
 95 These examples highlight the need to study both the immediate and  
 96 delayed effects of density to understand and predict population  
 97 dynamics, especially for pest species, in order to more efficiently  
 98 manage and control their populations (Alkema et al., 2019). In this  
 99 study, we focus on *Drosophila suzukii*, a pest of many berry and  
 100 stone fruit crops in Asia, Europe and America (Dos Santos et al.,  
 101 2017; Lee et al., 2011). Females possess a serrated ovipositor  
 102 (Atallah et al., 2014) that allow them to lay eggs in healthy fruits  
 103 without any wounds, unlike most other Drosophilidae that oviposit  
 104 on ripe or damaged fruits (Mitsui et al., 2006). This polyphagous fly  
 105 thus induces severe economic losses for agricultural production  
 106 (Knapp et al., 2021). Despite its main agricultural impacts, the  
 107 immediate and delayed effects of density on life-history traits have  
 108 not been deeply investigated in this species. Few publications  
 109 indicate that at high larval densities, the weight (Kienzle et al., 2020)  
 110 and survival (Wang et al., 2019) of adults decrease. A high density  
 111 can also alter the chemical composition and microbial diversity of  
 112 the food medium in which larvae developed due to foraging and  
 113 excretion of conspecifics (Henry et al., 2020).  
 114

115 In the present study, we aimed at characterizing the immediate and  
 116 delayed effects of larval density on major life history traits of *D.*  
 117 *suzukii*. To fulfil this objective, we first investigated how females  
 118 distribute their eggs in fruits in order to establish a relevant range of  
 119 larval density per fruit to test the effect of larval densities on larval  
 120 and imaginal life-history traits. Densities ranging from 1 to 50 larvae  
 121 were thus tested in two resource volumes mimicking two sizes of  
 122 fruit. Due to the absence of relevant literature, we had two opposite  
 123 predictions: high densities have positive effects due to feeding  
 124 facilitation or negative effects on life-history traits due to larval  
 125 competition. Likewise, we expected that, according to the larval  
 126 density and the volume of food resource, developmental time, adult  
 127 emergence rate, sex ratio of offspring, fecundity and adult size,  
 128 should change. Finally, we also tested whether the microbial  
 129 diversity and colony counts changed with the larval density.

130

## 131 **Materials and methods**

### 132 *Drosophila suzukii* line and rearing conditions

133 We used a *Wolbachia*-free line of *D. suzukii* originated from the  
 134 Agricultural Entomology Unit of the Edmund Mach Foundation in  
 135 San Michele All'Adige, Trento Province, Italy (Nikolouli et al.,  
 136 2020). Before and after the experiments, the absence of *Wolbachia*  
 137 was checked by PCR (see TableS1 for protocol). The flies were

138 reared on a cornmeal diet containing: 0.9% agar, 5% sugar, 3.3%  
139 cornmeal, 1.7% dried yeast, 0.4% nipagine, and maintained in an  
140 incubator at constant temperature (22.5 °C) and humidity (60%)  
141 with a 12-hours light/dark cycle.

142

### 143 *Oviposition assays*

144 Egg-laying behaviour was observed on blueberries. In a plexiglass  
145 box (23.8 x 17.8 x 2 cm), 3 groups of two blueberries (from organic  
146 farm) were placed using double-sided tape at equal distance from  
147 each other (FigureS1). A piece of sugar agar medium was placed in  
148 the center of the box to ensure the nutrition of the flies and  
149 hydration. In each box, one 7 days-old mated female was placed for  
150 18h (32 replicates were done) and then the number of eggs per fruit  
151 was counted under a binocular loupe.

152

### 153 *Experimental protocol for immediate and delayed effects of larvae* 154 *density on life-history traits*

155 Effect of larval density was tested using 1, 5, 10, 20 and 50 larvae  
156 and two volumes of medium, 2 or 5mL, in 25mL tubes (Eppendorf®  
157 Conical Tubes). For each of these 10 combinations of modalities, at  
158 least 8 replicates were performed (Figure1). The larval development  
159 conditions were standardized by allowing mated females at least one  
160 week old to oviposit for 24h. After egg hatching, larvae of the first  
161 stage (L1) were collected and then randomly assigned to one of the

162 ten experimental modalities. The experiments were conducted in  
163 two temporal blocks.

164

165 Several larval and adult life history traits were measured:

166

167 *Preimaginal developmental time and adult emergence rate:*

168 Tubes were checked twice a day in order to detect adult  
169 emergencies. For each tube, the emergence rate was calculated by  
170 comparing the number of adult flies with the number of larvae sown.  
171 Developmental time was estimated for each individual between L1  
172 and adult stages.

173

174 *Potential fecundity:*

175 Potential fecundity was assessed on 3-days-old emerging females by  
176 dissection of their abdomen in PBS. To put them sleep, females were  
177 first placed for at least 30 min in the freezer. The number of mature  
178 eggs was counted in the two ovaries (20 females per modality) with  
179 a binocular loupe as described in Plantamp et al. (2017).

180

181 *Wing length and width:*

182 Prior to dissection, the right wing of females, a classical proxy of  
183 the adults' size in *Drosophila* (David et al., 1994), was taken and  
184 placed on a microscope slide. Coverslips were sealed using nail



185 polish. Images of the wings were acquired using the AxioVisio 4.8  
186 software on a Zeiss Imager.Z1. microscope. Two measures were  
187 performed (see FigureS2) on 20 females per modality: the length  
188 corresponds to the distance between the tip of the wing, and the R<sub>4+5</sub>  
189 vein, and width to the distance between the R<sub>2+3</sub> and the Cu<sub>A1</sub> veins  
190 ([https://commons.wikimedia.org/wiki/File:Drosophilidae\\_wing\\_ve](https://commons.wikimedia.org/wiki/File:Drosophilidae_wing_veins-1.svg)  
191 [ins-1.svg](https://commons.wikimedia.org/wiki/File:Drosophilidae_wing_veins-1.svg)).

## 192 193 *Diversity and quantity of microorganisms*

194 In order to test whether the larval density (and thus feeding and  
195 excretion) changes the diversity of bacteria in the food medium, we  
196 inoculated medium from the vials where the larvae developed in.  
197 Using an inoculation loop, around 10μL of food medium were  
198 sampled under sterile conditions and diluted in 100μL of ultrapure  
199 water. These mixtures were then streaked on two solid growth  
200 media, LB (Lysogeny Broth amended with 5% Agar) and TSA  
201 (Tryptone Soy Agar), in 90 mm Petri dishes (8 boxes per modality  
202 and per medium, *i.e.* 160 Petri dishes in total). After sealing with  
203 parafilm to limit drought and cross-contaminations, the Petri dishes  
204 were incubated aerobically for 7 days at 37 °C in the dark. The  
205 counts were realized on ¼ randomly chosen part of the Petri dishes  
206 at the end of the incubation. Control Petri dishes were incubated to  
207 evaluate potential contamination during incubation. All controls  
208 remained blank until the end of the experiment.

209

## 210 *Statistical analysis*

211 To test whether, after 18h of oviposition period, the distribution of  
 212 eggs laid by a female was aggregated or random, we fitted different  
 213 theoretical distributions (GLMs with Poisson, negative binomial  
 214 (NB) distributions, and zero-inflated negative binomial (ZINB)  
 215 distributions, with log and logit link, respectively) to the number of  
 216 eggs deposited per fruit, and to the number of fruits infested per  
 217 female. NB and ZINB are usually used to fit aggregated  
 218 distributions. ZINB is used for overdispersed count variables,  
 219 allowing to model data with excessive zeros. The AIC values were  
 220 used to compare the different fitted models.

221 We tested whether there was a differential oviposition rate between  
 222 females with two mixed generalized linear models (GLMM)  
 223 adjusted with a Poisson distribution. For each GLMM, the total  
 224 number of eggs and the number of infected blueberries were the  
 225 dependent variables, respectively, while the box was the  
 226 independent variable. In both models, the date was included as a  
 227 random factor.

228 The effects of larval density on emergence rate (*i.e.* the total number  
 229 of emerging adults per tube) were analyzed with a GLMM (binomial  
 230 distribution, logit link). We included the volume, the density and the  
 231 sex of the individuals as independent variables, as well as all the  
 232 double interaction, and the block as a random factor.

233 The effects of larval density on the number of microbial colonies per  
 234 medium plate were analyzed by the means of a GLMM (Poisson  
 235 distribution, log link). We also included the volume and the growth  
 236 medium as independent variables, as well as all the double  
 237 interactions; the tube where the aliquot was taken was included as a  
 238 random factor. A Tukey test was used for comparisons between  
 239 treatments.

240 To test the effect of density and volume on life-history traits, four  
 241 different GLMs were performed. Because of the unbalanced  
 242 designs, we performed type-III analysis of variance (Shaw &  
 243 Mitchell-Olds, 1993) for each of these models. Development time,  
 244 fecundity and size of the wings (length and width) were used as  
 245 dependent variables, while volume, density and block corresponded  
 246 to the independent variables. In the case of development time, the  
 247 sex of the emerging individuals was also used as an independent  
 248 variable. We compared treatments using the post-hoc Least  
 249 Significant Difference (LSD) test with Benjamini-Hochberg (1995)  
 250 procedure, whereby a separate analysis for each treatment and  
 251 corresponding interactions are obtained (Engqvist, 2005). In the  
 252 case of density, the control was 1 larva. Pairwise Spearman  
 253 correlation was calculated between wings' length and wings' width.  
 254 All analyses were performed in R version 4.0.2 (Team, 2020) with

the “emmeans” (Lenth & Lenth, 2018), “multcompView” (Graves et al., 2015) and “car” (Fox & Weisberg, 2019) packages.

## Results

### *Oviposition assays*

The objective of this first experiment was to have an estimation of the range of larval density per fruit. Globally, 44.27% of the blueberries were infested (per box  $2.65 \pm 1.75$ ). The number of eggs per infested fruit varied from 1 to 11 ( $1.34 \pm 0.4$ ). 31.77% of females oviposited more than one egg per fruit.

ZINB turned out to be the best model to explain the distribution of the number of eggs per fruit (TableS2), showing that the distribution of eggs was in aggregates with an extra number of non-infested fruits than expected under classical negative binomial distribution ( $z=6.47$ ,  $p<0.001$ ; FigureS3). No significant differences ( $\chi^2_1=2.887$ ,  $p=0.089$ ) between females were found in the number of eggs deposited per box (1 to 24 eggs,  $8.03 \pm 6.34$ ). We draw the same conclusion for the number of blueberries infected per box ( $\chi^2_1=2.155$ ,  $p=0.142$ ).

### *Immediate effects of larval density*

#### *Effect of larval density and resource volume on adult emergence*

277 The average emergence rate was  $0.59 \pm 0.06$ . Neither larval density  
278 nor the volume of food affected emergence rate ( $\chi^2_1=0.277$ ,  
279  $p=0.598$ ;  $\chi^2_1=2.444$ ,  $p=0.118$  respectively; Figure2A and  
280 FigureS4A), and there was no significant interaction between these  
281 two variables ( $\chi^2_1=3.198$ ,  $p=0.073$ ). Fly emergence did not vary  
282 with the sex of the emergent individuals ( $\chi^2_1=0.167$ ,  $p=0.682$ ), and  
283 we did not detect interactions between sex and density ( $\chi^2_1=1.992$ ,  
284  $p=0.158$ ) or between sex and volume ( $\chi^2_1=0.441$ ,  $p=0.506$ ).

285

286 *Effect of larval density and resource volume on larval development*  
287 *time*

288 The larval development time was affected by volume of resource  
289 available for larval feeding ( $F_{1,940}=50.632$ ,  $p<0.001$ ), density  
290 ( $F_{4,940}=32.437$ ,  $p<0.001$ ), sex ( $F_{1,940}=47.53$ ,  $p<0.001$ ) and block  
291 ( $F_{1,940}=82.843$ ,  $p<0.001$ ; TableS3). In general, individuals that have  
292 grown in the lowest larval density (*i.e.* 1 larva) took more days  
293 ( $0.83 \pm 0.21$ ) to develop compared to the other densities (Figure2B).  
294 Also, the emerging females took more days to develop than males  
295 (mean difference= $0.45 \pm 0.03$ ; FigureS6). The interaction between  
296 volume and block ( $F_{1,940}=37.803$ ,  $p<0.001$ ; TableS4) and density  
297 and block ( $F_{4,940}=10.778$ ,  $p<0.001$ ; TableS5) were significant. The  
298 individuals raised in the block1 took longer time to develop than  
299 individuals tested in block2 in both resource volume (FigureS5B).

300 The same pattern was observed in the interaction with density,  
301 excepted for density 50 where developmental times were the same  
302 for the two blocks (TableS6, FigureS4B).

303

304 *Effect of larval density and resource volume on microbial diversity*  
305 *and colony counts*

306 Whatever the larval density and the volume of resources, all  
307 colonies harbored an identical morphology, suggesting a limited  
308 diversity in all modalities (FigureS7).

309 However, the colony counts differed with a significant interaction  
310 between larval density and the bacterial growth medium  
311 ( $\chi^2_4=112.858$ ,  $p<0.001$ ; TableS7, FigureS8). The number of  
312 colonies ( $174.23\pm140.07$ ) increased with the density of larvae  
313 (TableS8, Figure3), and globally colonies were more numerous in  
314 the LB medium as compared to the TSA medium (TableS8, S9).

315 Likewise, the interaction between the volume of food and the  
316 growth medium was significant ( $\chi^2_1=21.323$ ,  $p<0.001$ ), mainly due  
317 to a fewer number of colonies grown on TSA medium compared to  
318 LB medium in samples from 2 mL of resources.

319

320 *Delayed effects of larval density*

321 *Effect of larval density and resource volume on female fecundity*

322 Females developed in low density laid more eggs ( $7.91 \pm 4.62$ )  
 323 compared to those raised at high densities ( $5.41 \pm 4.31$ ). Both, larval  
 324 density ( $F_{4,241}=4.246$ ,  $p<0.01$ ; Figure2C) and volume of resources  
 325 ( $F_{1,241}=27.493$ ,  $p<0.001$ ) have an impact on fecundity. However,  
 326 there were differences between blocks ( $F_{1,241}=4.525$ ,  $p<0.05$ ;  
 327 TableS10; FigureS4C) with a significant interaction ( $F_{4,241}=2.868$ ,  
 328  $p<0.05$ ; TableS11): at density 5, the individuals that developed in  
 329 block 2 had more eggs than those that developed in block 1 ( $z=-$   
 330  $3.339$ ,  $p<0.001$ ; TableS12, FigureS4C).

331

332 *Effect of larval density and resource volume on wing length and*  
 333 *width*

334 As the length and the width of the wings were positively correlated  
 335 (Spearman's  $r_{255}=0.84$ ,  $p<0.001$ , FigureS9), we presented only  
 336 results of the length (FigureS10 and see sup mat for width TableS17-  
 337 TS20). Globally, individuals that have developed with few larvae  
 338 have a wider wing length than the other ones ( $F_{4,241}=31.408$ ,  
 339  $p<0.001$ ). However, there is a significant interaction between larval  
 340 density and resource volume ( $F_{4,241}=4.756$ ,  $p<0.01$ ; TableS13,  
 341 TableS14, Figure2D) which is mainly due to the differences at  
 342 density 50: the individuals that had grown in 2 mL emerged with the  
 343 smallest wings which is the contrary at the other larvae densities  
 344 ( $z=-4.17$ ,  $p<0.0001$ ; TableS15). The interaction between volume

345 and block was also significant ( $F_{1,241}=26.586$ ,  $p<0.001$ ; TableS16,  
346 FigureS5D), but there were no differences between the blocks  
347 ( $F_{4,241}=0.256$ ,  $p=0.61$ ).

348

## 349 Discussion

350 Our study gives insights into the range of eggs or larvae that can be  
351 found in fruits infested by *D. suzukii*, and the potential effects of the  
352 larval density on major life-history traits of this pest and their related  
353 trade-offs.

354

355 In phytophagous species, for which immature develop within a finite  
356 volume of resources (e.g. fruits or seeds), mothers' oviposition  
357 strategy determines the fate of offspring and their fitness (Doak et  
358 al., 2006). Our results showed that the oviposition strategy of *D.*  
359 *suzukii* females results in an aggregative distribution of eggs in  
360 fruits: until 11 eggs have been laid by one female in the same  
361 blueberry, with an average of more than 2.5 eggs per infested fruit.  
362 This suggests that, in conditions where fruits could be limiting (for  
363 instance in the beginning of the fruit season or in greenhouses  
364 cultures), high densities of immature in a given fruit is likely. It is  
365 surprising, that for this major pest species, the density of larvae per  
366 fruit in the field is still unknown. Only indirect measures are  
367 available (Elsensohn et al., 2021) and confirm the possibility of high



larval density per fruit (e.g. per berry  $4.2 \pm 1.3$  in raspberries (Burrack et al., 2013) and  $2.6 \pm 0.8$  in mulberries (Yu et al., 2013)). However, our results are not informative about the oviposition strategy *sensu stricto* (i.e. choice of fruits, number of eggs laid at each oviposition bout, sequence of eggs deposition). Indeed, as shown by Desouhant et al. (1998) (on the chestnut weevils, *Curculio elephas*), different oviposition strategies (random, aggregate or uniform) can lead to aggregated distributions of eggs. However, our results strongly suggest that, at least in our lab conditions (i.e. few available fruits), a *D. suzukii* female does not avoid fruits already containing its own eggs.

Usually larval density affects immediately lifespan and other fitness traits such as development time like in *D. melanogaster* (Horváth & Kalinka, 2016). Here, we observed contrasted effects of density on larval life history traits. We did not find any change in preimaginal survival (from L1 to adult emergence) between densities or between sexes. This conclusion is valid regardless of the resource volume (mimicking two sizes of fruits) while we expected an increase of negative density dependent effects in the small resource volume. In contrast, the larval development time of flies was negatively affected when density increased: *D. suzukii* larvae raised in high densities developed faster. Two mutually non-exclusive hypotheses

could explain this result. First, a shorter developmental time could result from facilitation effect. The food medium is more intensively digested, allowing an increase in food intake rate that results in a reduction of the developmental time. Feeding facilitation and short development has been documented in the Queensland fruit fly *Bactrocera tryoni* (Morimoto et al., 2018). Second, a faster development could allow escaping competition and avoid mortality driven by the risk of running out of resources before metamorphosis, as shown in the dung fly *Scathophaga stercoraria* (Blanckenhorn, 1999). However, in our experiments, larvae reared in the smallest volume of food (2 mL, *i.e.* the highest competition intensity) took more days to reach adult stage than those reared in 5 mL, regardless of larval density. This clearly means that, when facing to a greater intra-specific competition intensity (due to a reduction of available resource), the larvae strategy is to compensate for reduced nutrient intake by increasing their development time. Several species of phytophagous insects display this strategy with an extension of the larval period, potentially allowing through an extension of the feeding time to reach a size threshold compatible with metamorphosis and viable physiological conditions (Yang et al., 2015). This developmental plasticity (Mackay, 2001) is expected to be selected for when immature have no opportunity to find food resource outside the oviposition site chosen by their mother, such as

414 in *D. suzukii*. A similar pattern was observed in the tropical butterfly  
 415 *Bicyclus anynana*. Its larval development time was also reduced  
 416 when the larvae were reared at high densities, but the development  
 417 time was prolonged when experiencing food stress, suggesting more  
 418 time available for feeding (Bauerfeind & Fischer, 2005). At last, we  
 419 showed that males emerged before females, but the sex ratio was not  
 420 affected. The sex-specific differences in development time, where  
 421 females take more days to reach the adult stage, may be associated  
 422 with maximizing the number of matings for males (protandry)  
 423 (Teder et al., 2021). In addition, a longer timing of maturation would  
 424 allow females to reach a bigger size, which entails an advantage in  
 425 their fecundity (Honěk, 1993; Teder et al., 2021).

426  
 427 Larval density also had an immediate effect on the bacterial  
 428 community of the larval food medium: though apparent diversity did  
 429 not change, the number of bacterial colonies increased with the  
 430 larval density, without any negative effect on the preimaginal  
 431 survival. Moreover, as we did not observe any changes in bacterial  
 432 morphotypes according to the different larval densities tested, a  
 433 confounding effect due to the appearance of another bacterial type  
 434 is not to be considered. This indicates that the changes in life traits  
 435 observed are indeed due to the density. A complete picture of the  
 436 potential interactions between density effects and the emergence of

437 different bacterial or fungal types, as would occur in natural  
438 conditions, would require complementary experiments and more  
439 discriminating approaches (e.g. using molecular affiliations). They  
440 would also permit to test the susceptibility of insects to bacteria in  
441 their environment.

442

443 Density effects detected on immature stages had also consequences  
444 on the adult life-history traits. One of the most remarkable effects of  
445 crowding during larval development is the decline of female  
446 fecundity. In our study, the females that experienced high larval  
447 densities had a lower number of mature eggs present in their  
448 ovarioles. This negative impact is observed in numerous species (see  
449 Vamosi & Lesack, 2007). As observed in other species (e.g. in *C.*  
450 *vomitatoria*, (Ireland & Turner, 2006); and in *B. tryoni*, (Morimoto et  
451 al., 2019)), in *D. suzukii*, the decrease in the number of eggs  
452 produced is positively correlated to a reduction of the wing size, a  
453 proxy of body size (Sokoloff, 1966). Our study also corroborates  
454 that body size is an important determinant of female fecundity (see  
455 also Honěk, 1993; Leather, 2018).

456

457 The results presented above showed a phenotypic trade-off between  
458 larval and adult life-history traits. High larval density led immature  
459 to develop faster as the expense of adults' size and fecundity.

460 Throughout the genus *Drosophila*, this trade-off between juvenile  
461 developmental rate and adult viability is described (Prasad et al.,  
462 2000). For example, *D. melanogaster* has an antagonistic pleiotropy  
463 between developmental rate and early- and late-life survival  
464 (Chippindale et al., 2004). We assume that, at high density, female  
465 fitness is negatively affected by a reduction in flight ability and thus  
466 in the search for suitable oviposition sites, as well as by the risk of  
467 becoming egg-limited due to reduced egg load (Rosenheim, 2011).  
468 This reasoning implies a negative correlation between size and  
469 reproductive success in the field that is not always proven (Ellers et  
470 al., 1998; West et al., 1996). In addition, an estimate of the impact  
471 of larval density on adult longevity would be relevant to an accurate  
472 estimation of density dependent effects on fitness.

473

## 474 **Conclusion**

475 The females of *D. suzukii* laid their eggs in an aggregate distribution  
476 which promotes crowding of the larvae. Contrary to expectations,  
477 preimaginal survival to adult emergence was not affected. However,  
478 larval development time shortened as density increased and  
479 resources became more limited. Furthermore, rearing at high larval  
480 densities negatively affected the fitness of adults which were smaller  
481 and had reduced fecundity. Our results support the existence of  
482 trade-off between larvae and adult life-history traits. A greater

483 understanding of the effect of density on the population dynamics of  
484 this pest may result in more successful alternative control measures.

485

## 486 **Acknowledgments**

487 This work was supported by the ANR (ANR-19-CE32-0010), which  
488 also awarded A. Reyes-Ramírez post-doctoral fellowship. We also  
489 thank X. Fauvergue, N. Ris, A. Auguste and L. van Oudenhove for  
490 useful discussion on data.

491

## 492 **References**

- 493 Agnew, P., Hide, M., Sidobre, C., & Michalakis, Y. (2002). A  
494 minimalist approach to the effects of density-dependent  
495 competition on insect life-history traits. *Ecological*  
496 *Entomology*, 27(4), 396–402.
- 497 Alkema, J. T., Dicke, M., & Wertheim, B. (2019). Context-  
498 dependence and the development of push-pull approaches for  
499 integrated management of *Drosophila suzukii*. *Insects*, 10(12),  
500 454.
- 501 Angell, C. S., Oudin, M. J., Rode, N. O., Mautz, B. S.,  
502 Bonduriansky, R., & Rundle, H. D. (2020). Development time  
503 mediates the effect of larval diet on ageing and mating  
504 success of male antler flies in the wild. *Proceedings of the*  
505 *Royal Society B*, 287(1938), 20201876.

506 Atallah, J., Teixeira, L., Salazar, R., Zaragoza, G., & Kopp, A.  
507 (2014). The making of a pest: the evolution of a fruit-  
508 penetrating ovipositor in *Drosophila suzukii* and related  
509 species. *Proceedings of the Royal Society B: Biological*  
510 *Sciences*, 281(1781), 20132840.

511 Aukema, B. H., & Raffa, K. F. (2004). Does aggregation benefit  
512 bark beetles by diluting predation? Links between a group-  
513 colonisation strategy and the absence of emergent multiple  
514 predator effects. *Ecological Entomology*, 29(2), 129–138.

515 Bauerfeind, S. S., & Fischer, K. (2005). Effects of food stress and  
516 density in different life stages on reproduction in a butterfly.  
517 *Oikos*, 111(3), 514–524.

518 Benjamini, Y., & Hochberg, Y. (1995). Controlling the false  
519 discovery rate: A practical and powerful approach to multiple  
520 testing. *J R Stat Soc*, 57(1), 289–300.

521 Blanckenhorn, W. U. (1999). Different growth responses to  
522 temperature and resource limitation in three fly species with  
523 similar life histories. *Evolutionary Ecology*, 13(4), 395–409.

524 Burrack, H. J., Fernandez, G. E., Spivey, T., & Kraus, D. A.  
525 (2013). Variation in selection and utilization of host crops in  
526 the field and laboratory by *Drosophila suzukii* Matsumara  
527 (Diptera: Drosophilidae), an invasive frugivore. *Pest*  
528 *Management Science*, 69(10), 1173–1180.

529 Chippindale, A. K., Alipaz, J. A., & Rose, M. R. (2004).  
530 Experimental evolution of accelerated development in  
531 *Drosophila*. 2. Adult fitness and the fast development  
532 syndrome. In *Methuselah flies: A case study in the evolution*  
533 *of aging* (pp. 413–435). World Scientific.

534 Correa, M. A., Brackney, D. E., & Steven, B. (2018). Axenic  
535 *Aedes aegypti* develop without live bacteria, but exhibit  
536 delayed development and reduced oviposition. *BioRxiv*,  
537 264978.

538 David, J. R., Moreteau, B., Gauthier, J. P., Pétavy, G., Stockel, A.,  
539 & Imasheva, A. G. (1994). Reaction norms of size characters  
540 in relation to growth temperature in *Drosophila melanogaster*:  
541 an isofemale lines analysis. *Genetics Selection Evolution*,  
542 26(3), 229–251.

543 DENNO, R., & Benrey, B. (1997). Aggregation facilitates larval  
544 growth in the neotropical nymphalid butterfly *Chlosyne*  
545 *janais*. *Ecological Entomology*, 22(2), 133–141.

546 Descamps, S., Boutin, S., Berteaux, D., McAdam, A. G., &  
547 Gaillard, J.-M. (2008). Cohort effects in red squirrels: the  
548 influence of density, food abundance and temperature on  
549 future survival and reproductive success. *Journal of Animal*  
550 *Ecology*, 305–314.

551 Desouhant, E., Debouzie, D., & Menu, F. (1998). Oviposition



552 pattern of phytophagous insects: on the importance of host  
553 population heterogeneity. *Oecologia*, 114(3), 382–388.

554 Dethier, V. G. (1959). Food-plant distribution and density and  
555 larval dispersal as factors affecting insect populations. *The*  
556 *Canadian Entomologist*, 91(9), 581–596.

557 Doak, P., Kareiva, P., & Kingsolver, J. (2006). Fitness  
558 consequences of choosy oviposition for a time-limited  
559 butterfly. *Ecology*, 87(2), 395–408.

560 Dos Santos, L. A., Mendes, M. F., Krüger, A. P., Blauth, M. L.,  
561 Gottschalk, M. S., & Garcia, F. R. M. (2017). Global potential  
562 distribution of *Drosophila suzukii* (Diptera, Drosophilidae).  
563 *PloS One*, 12(3), e0174318.

564 Ellers, J., Van Alphen, J. J. M., & Sevenster, J. G. (1998). A field  
565 study of size–fitness relationships in the parasitoid *Asobara*  
566 *tabida*. *Journal of Animal Ecology*, 67(2), 318–324.

567 Elsensohn, J. E., Aly, M. F. K., Schal, C., & Burrack, H. J. (2021).  
568 Social signals mediate oviposition site selection in *Drosophila*  
569 *suzukii*. *Scientific Reports*, 11(1), 1–10.

570 Engqvist, L. (2005). The mistreatment of covariate interaction  
571 terms in linear model analyses of behavioural and  
572 evolutionary ecology studies. *Animal Behaviour*, 70(4).

573 Fagan, W. F., Lewis, M. A., Neubert, M. G., & Van Den  
574 Driessche, P. (2002). Invasion theory and biological control.

575       *Ecology Letters*, 5(1), 148–157.

576     Fantinou, A. A., Perdikis, D. C., & Stamogiannis, N. (2008). Effect  
577       of larval crowding on the life history traits of *Sesamia*  
578       *nonagrioides* (Lepidoptera: Noctuidae). *European Journal of*  
579       *Entomology*, 105(4).

580     Ferguson, S. H., & Joly, D. O. (2002). Dynamics of springtail and  
581       mite populations: the role of density dependence, predation,  
582       and weather. *Ecological Entomology*, 27(5), 565–573.

583     Fox, J., & Weisberg, S. (2019). An R companion to applied  
584       regression (Third). *Thousand Oaks CA: Sage*.

585     Gibbs, M., Lace, L. A., Jones, M. J., & Moore, A. J. (2004).  
586       Intraspecific competition in the speckled wood butterfly  
587       *Pararge aegeria*: effect of rearing density and gender on larval  
588       life history. *Journal of Insect Science*, 4(1), 16.

589     Grafen, A. (1988). On the uses of data on lifetime reproductive  
590       success. *Reproductive Success*, 454–485.

591     Graves, S., Piepho, H.-P., & Selzer, M. L. (2015). Package  
592       ‘multcompView.’ *Visualizations of Paired Comparisons*.

593     Henry, Y., Tarapacki, P., & Colinet, H. (2020). Larval density  
594       affects phenotype and surrounding bacterial community  
595       without altering gut microbiota in *Drosophila melanogaster*.  
596       *FEMS Microbiology Ecology*, 96(4), fiae055.

597     Hixon, M. A., & Johnson, D. W. (2009). Density dependence and

598 independence. *ELS*.

599 Honěk, A. (1993). Intraspecific variation in body size and

600 fecundity in insects: a general relationship. *Oikos*, 483–492.

601 Horváth, B., & Kalinka, A. T. (2016). Effects of larval crowding

602 on quantitative variation for development time and viability in

603 *Drosophila melanogaster*. *Ecology and Evolution*, 6(23),

604 8460–8473.

605 Ireland, S., & Turner, B. (2006). The effects of larval crowding

606 and food type on the size and development of the blowfly,

607 *Calliphora vomitoria*. *Forensic Science International*, 159(2–

608 3), 175–181.

609 Kienzle, R., Groß, L. B., Caughman, S., & Rohlf, M. (2020).

610 Resource use by individual *Drosophila suzukii* reveals a

611 flexible preference for oviposition into healthy fruits.

612 *Scientific Reports*, 10(1), 1–9.

613 Knapp, L., Mazzi, D., & Finger, R. (2021). The economic impact

614 of *Drosophila suzukii*: perceived costs and revenue losses of

615 Swiss cherry, plum and grape growers. *Pest Management*

616 *Science*, 77(2), 978–1000.

617 Leather, S. R. (2018). Factors affecting fecundity, fertility,

618 oviposition, and larviposition in insects. In *Insect*

619 *reproduction* (pp. 143–174). CRC Press.

620 Lee, J. C., Bruck, D. J., Dreves, A. J., Ioriatti, C., Vogt, H., &

621       Baufeld, P. (2011). In focus: spotted wing drosophila,  
622       Drosophila suzukii, across perspectives. *Pest Management*  
623       *Science*, 67(11), 1349–1351.

624       Lenth, R., & Lenth, M. R. (2018). Package ‘lsmeans.’ *The*  
625       *American Statistician*, 34(4), 216–221.

626       Mackay, T. F. (2001). *The genetic architecture of quantitative*  
627       *traits*.

628       Mitsui, H., Takahashi, K. H., & Kimura, M. T. (2006). Spatial  
629       distributions and clutch sizes of Drosophila species  
630       ovipositing on cherry fruits of different stages. *Population*  
631       *Ecology*, 48(3), 233–237.

632       Morimoto, J., Nguyen, B., Dinh, H., Than, A. T., Taylor, P. W., &  
633       Ponton, F. (2019). Crowded developmental environment  
634       promotes adult sex-specific nutrient consumption in a  
635       polyphagous fly. *Frontiers in Zoology*, 16(1).  
636       <https://doi.org/10.1186/s12983-019-0302-4>

637       Morimoto, J., Nguyen, B., Tabrizi, S. T., Ponton, F., & Taylor, P.  
638       (2018). Social and nutritional factors shape larval  
639       aggregation, foraging, and body mass in a polyphagous fly.  
640       *Scientific Reports*, 8(1), 1–10.

641       Mueller, L. D. (1997). Theoretical and empirical examination of  
642       density-dependent selection. *Annual Review of Ecology and*  
643       *Systematics*, 28(1), 269–288.

644 Nestel, D., Papadopoulos, N. T., Pascacio-Villafán, C., Righini, N.,  
645 Altuzar-Molina, A. R., & Aluja, M. (2016). Resource  
646 allocation and compensation during development in  
647 holometabolous insects. *Journal of Insect Physiology*, 95, 78–  
648 88.

649 Nikolouli, K., Sassù, F., Mouton, L., Stauffer, C., & Bourtzis, K.  
650 (2020). Combining sterile and incompatible insect techniques  
651 for the population suppression of *Drosophila suzukii*. *Journal*  
652 *of Pest Science*, 93(2), 647–661.

653 Parker, I. M., & Gilbert, G. S. (2018). Density-dependent disease,  
654 life-history trade-offs, and the effect of leaf pathogens on a  
655 suite of co-occurring close relatives. *Journal of Ecology*,  
656 106(5), 1829–1838.

657 Partridge, L., & Fowler, K. (1993). Responses and correlated  
658 responses to artificial selection on thorax length in *Drosophila*  
659 *melanogaster*. *Evolution*, 47(1), 213–226.

660 Peters, H. A. (2003). Neighbour-regulated mortality: the influence  
661 of positive and negative density dependence on tree  
662 populations in species-rich tropical forests. *Ecology Letters*,  
663 6(8), 757–765.

664 Peters, T. M., & Barbosa, P. (1977). Influence of population  
665 density on size, fecundity, and developmental rate of insects  
666 in culture. *Annual Review of Entomology*, 22(1), 431–450.

667 Pickens, B. A. (2007). Understanding the population dynamics of a  
668 rare, polyvoltine butterfly. *Journal of Zoology*, 273(3), 229–  
669 236.

670 Plantamp, C., Estragnat, V., Fellous, S., Desouhant, E., & Gibert,  
671 P. (2017). Where and what to feed? Differential effects on  
672 fecundity and longevity in the invasive *Drosophila suzukii*.  
673 *Basic and Applied Ecology*, 19, 56–66.

674 Ponton, F., & Morimoto, J. (2020). Integrative developmental  
675 ecology: a review of density-dependent effects on life-history  
676 traits and host-microbe interactions in non-social  
677 holometabolous insects. *Evolutionary Ecology*, 34(5), 659–  
678 680.

679 Prasad, N. G., SHAKARAD, M., GOHIL, V. M., Sheeba, V.,  
680 Rajamani, M., & JOSHI, A. (2000). Evolution of reduced pre-  
681 adult viability and larval growth rate in laboratory populations  
682 of *Drosophila melanogaster* selected for shorter development  
683 time. *Genetics Research*, 76(3), 249–259.

684 Putman, R. J. (1977). Dynamics of the blowfly, *Calliphora*  
685 erythrocephala, within carrion. *The Journal of Animal*  
686 *Ecology*, 853–866.

687 Rosenheim, J. A. (2011). Stochasticity in reproductive opportunity  
688 and the evolution of egg limitation in insects. *Evolution:*  
689 *International Journal of Organic Evolution*, 65(8), 2300–

690           2312.

691     Sato, T., Shinkaji, N., & Amano, H. (2004). Effects of larval

692           density on larval survivorship and imaginal fecundity of

693           *Dacne picta* (Coleoptera: Erotylidae). *Applied Entomology*

694           *and Zoology*, 39(4), 591–596.

695     Shaw, R. G., & Mitchell-Olds, T. (1993). ANOVA for unbalanced

696           data: an overview. *Ecology*, 74(6), 1638–1645.

697     Sokoloff, A. (1966). Morphological variation in natural and

698           experimental populations of *Drosophila pseudoobscura* and

699           *Drosophila persimilis*. *Evolution*, 49–71.

700     Team, R. C. (2020). R Software: Version 4.0. 2. *R Foundation for*

701           *Statistical Computing: Vienna, Austria*.

702     Teder, T., Kaasik, A., Tait, K., & Tammaru, T. (2021). Why do

703           males emerge before females? Sexual size dimorphism drives

704           sexual bimaturism in insects. *Biological Reviews*, 96(6),

705           2461–2475.

706     Tripet, F., Clegg, S., Elnaïem, D.-E., & Ward, R. D. (2009).

707           Cooperative blood-feeding and the function and implications

708           of feeding aggregations in the sand fly, *Lutzomyia longipalpis*

709           (Diptera: Psychodidae). *PLoS Neglected Tropical Diseases*,

710           3(8), e503.

711     Vamosi, S. M., & Lesack, T. L. (2007). Direct effects of larval

712           competition on development time and fecundity in seed

713 beetles. *Evolutionary Ecology Research*, 9(7), 1131–1143.

714 Wang, X., Kaçar, G., & Daane, K. M. (2019). Temporal dynamics  
715 of host use by *Drosophila suzukii* in California's San Joaquin  
716 Valley: Implications for area-wide pest management. *Insects*,  
717 10(7), 206.

718 West, S. A., Flanagan, K. E., & Godfray, H. C. J. (1996). The  
719 relationship between parasitoid size and fitness in the field, a  
720 study of *Achrysocharoides zwoelferi* (Hymenoptera:  
721 Eulophidae). *Journal of Animal Ecology*, 631–639.

722 Yang, F., Hu, G., Shi, J. J., & Zhai, B. P. (2015). Effects of larval  
723 density and food stress on life-history traits of *C*  
724 *naphalocrocis medinalis* (L epidoptera: P yralidae). *Journal of*  
725 *Applied Entomology*, 139(5), 370–380.

726 Yu, D., Zalom, F. G., & Hamby, K. A. (2013). Host status and fruit  
727 odor response of *Drosophila suzukii* (Diptera: Drosophilidae)  
728 to figs and mulberries. *Journal of Economic Entomology*,  
729 106(4), 1932–1937.

730

731

732

733



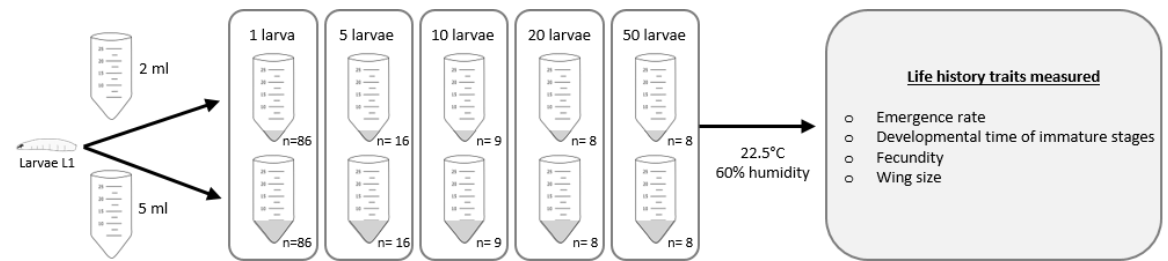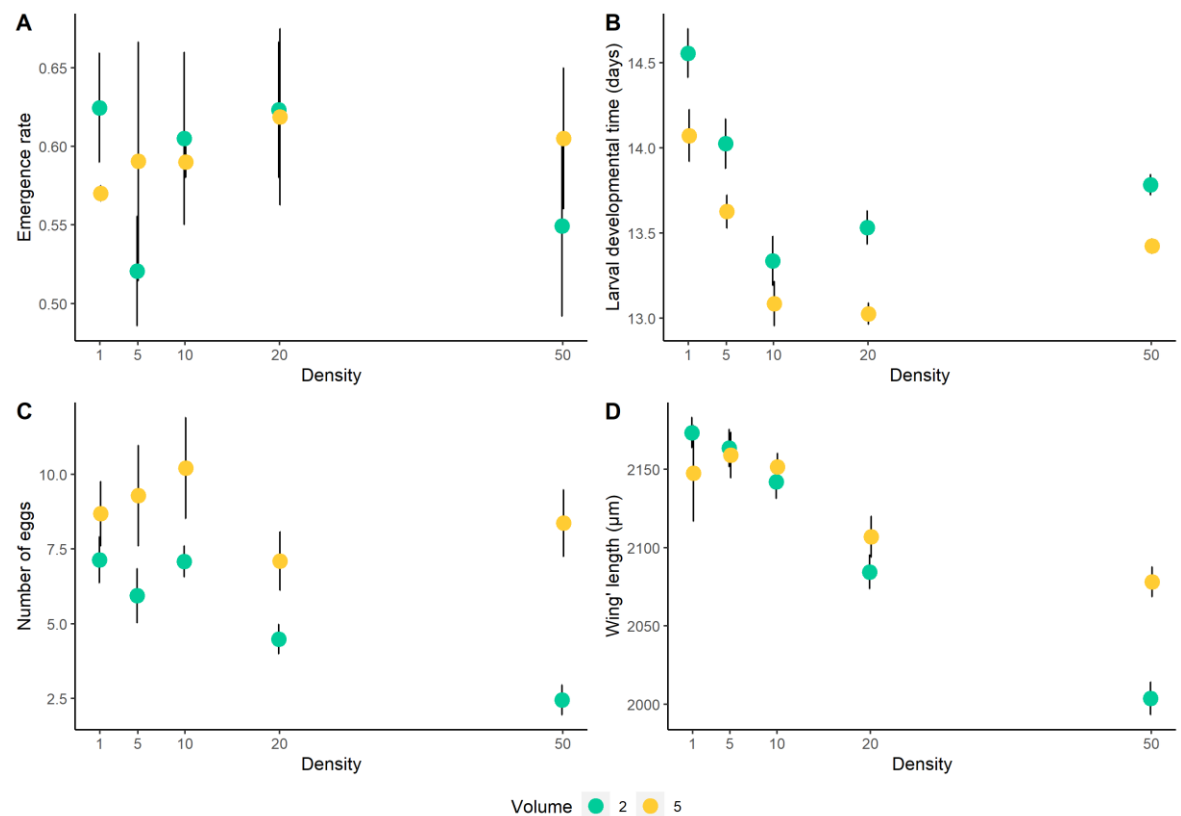

Figure 2. Effect of larval density and resource volume (2 (green) and 5 (yellow) mL of food medium) on immediate (A, B) and delayed (C, D) life-history traits (mean  $\pm$  SE) of *D. sukukii*. Panel (A) shows emergence rate. Panel (B) shows the developmental time for larvae

744 to emerge in days. Panel (C) shows fecundity measured as the  
745 number of eggs. Panel (D) shows wings' length.

746

747

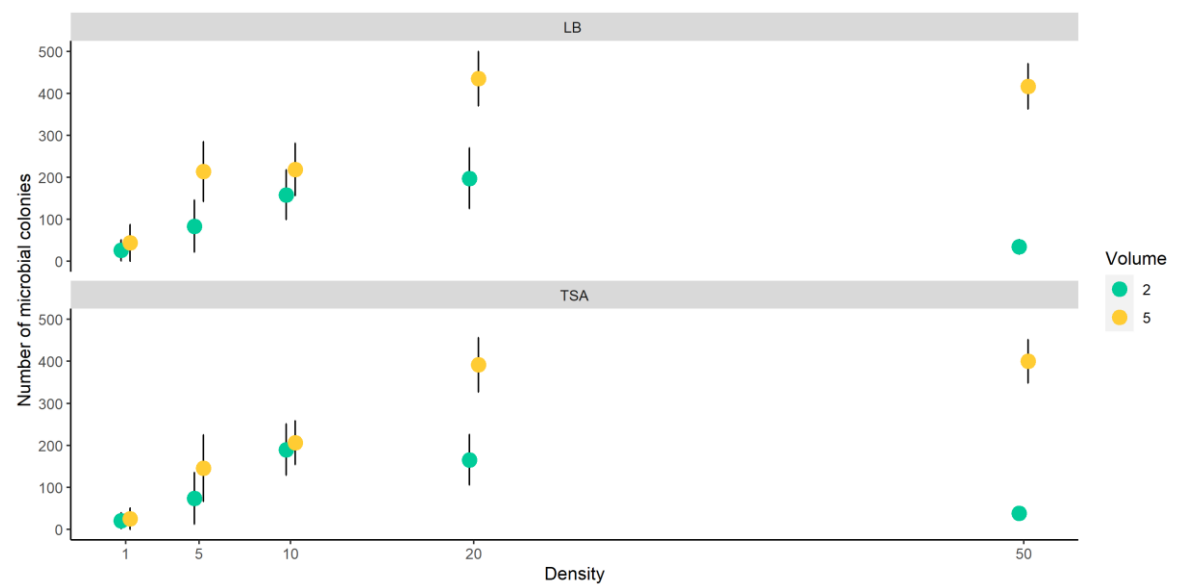

748

749 Figure3. Effect of larval density and resource volume (2 (green) and  
750 5 (yellow) mL of food) on the number of microbial colonies (mean  
751  $\pm$  SE) present in the medium where *D. sukuzii* larvae develop. Above  
752 are the colonies grown in LB medium and below those grown in  
753 TSA medium.

754
